# Supplementary material
Source: PubMed Central journal article supplement (PMC2903679)

**Table S1: List of primers used to make constructs described in this study**

|     | <b>Construct Name</b>             | <b>Primers (5'→3')</b>                                                                                                                                           |
|-----|-----------------------------------|------------------------------------------------------------------------------------------------------------------------------------------------------------------|
| 1   | FLAG-STAM-1 (1-195)               | Forward: GGAGGTCTATATAAGCAGAGC<br>Reverse: ATATTCTAGATTAGGAAAGGGTGGTTGACTGCTG                                                                                    |
| 2   | FLAG-STAM-1 (1-269)               | Forward: GGAGGTCTATATAAGCAGAGC<br>Reverse: ATATTCTAGATTAAGTGAGATCTGCAGTCACAAA                                                                                    |
| 3   | FLAG-STAM-1 (1-390)               | Forward: GGAGGTCTATATAAGCAGAGC<br>Reverse: ATATTCTAGATTACTGATTCTGTAAC TTTGCATA                                                                                   |
| 4   | FLAG-STAM1 (391-540)              | Forward: ATATAAGCTTCCATATTATATGCAG<br>Reverse: GGGCCAGGAGAGGCACTG                                                                                                |
| 5   | FLAG-STAM-1 (144-540/ ΔVHS)       | Forward: ATATAAGCTTGCTATTGGCTCTCAGGCT<br>Reverse: GGGCCAGGAGAGGCACTG                                                                                             |
| 6   | FLAG-STAM-1 (337-540)             | Forward: ATATAAGCTTCACCAGATGGGACCTCTC<br>Reverse: GGGCCAGGAGAGGCACTG                                                                                             |
| 7.  | FLAG-STAM-1 (212-540)             | Forward: ATATAAGCTTGGCCGAAAAGTTCGTGC<br>Reverse: GGGCCAGGAGAGGCACTG                                                                                              |
| 8.  | FLAG-STAM-1 (270-540)             | Forward: ATATAAGCTTGCTGAACCAGAAATGATT<br>Reverse: GGGCCAGGAGAGGCACTG                                                                                             |
| 9.  | FLAG-STAM-1- Delta GAT (Δ343-377) | Forward 1: TGTCACCAGATGGGACCTCTCGATCCGATGTATTCCATGTATGC<br>Reverse 1: GAGAGGTCCCATCTGGTGACA<br>Forward 2: GGAGGTCTATATAAGCAGAGC<br>Reverse 2: GGGCCAGGAGAGGCACTG |
| 10. | GST-STAM-1-Delta GAT (Δ343-377)   | Forward: ATATGAATTCTGCCTCTTTTGGCCACCAATCCC<br>Reverse: ATATCTCGAGCTATAGCAGAGCCTTCTG                                                                              |
| 11. | GST-STAM-1-GAT (296-380)          | Forward: ATATGAATTC TGGAGCCGGAACCAGCC<br>Reverse: ATATCTCGAGCTACATCGGATCTTCGTTTCATTAAC                                                                           |
| 12. | FLAG-STAM-1-GAT (296-380)         | Forward: ATAT AAG CTT GAG CCG GAA CCA GCC<br>Reverse: ATATTCTAGACTACATCGGATCTTCGTTTCATTAAC                                                                       |
| 13. | YFP-STAM-1                        | Forward: ATATAAGCTTTGCCTCTTTTGGCCACCAATCCCTTC<br>Reverse: ATATGGTACCCTACATCGGATCTTCGTTTCATTAAC                                                                   |
| 14. | FLAG-Arr-2-(25-161)               | Forward: ATATAAGCTTCGGGACTTTGTGGACCAC<br>Reverse: CAAACAACAGATGGCTGGCAAC                                                                                         |
| 15. | GST-Arr-2-(25-161)                | Forward: ATATCCCGGGCGGGACTTTGTGGACCAC<br>Reverse: ATATCTCGAGCTACCGCTTGTGGATCTTCTCCTCCA                                                                           |

## Supplemental Figures

**Supplemental Figure S1.** (A-E) Equimolar amounts (~134 nM) of GST-arrestin-2 and GST immobilized on glutathione-Sepharose resin were incubated with lysates from HEK293 cells transiently transfected with various FLAG-STAM-1 constructs. Bound proteins were detected by immunoblotting using the anti-FLAG M2 antibody, followed by staining with Ponceau-S (B-E) or immunoblotting for GST (A) to assess the amount of GST fusion proteins used in the binding assays. Shown are representative blots from one of three independent experiments.

**Supplemental Figure S2.** Equimolar amounts (117 nM) of GST-STAM-1 and GST immobilized on glutathione-Sepharose resin were incubated with lysates from HEK293 cells transiently transfected with HA-arrestin-2 constructs. Bound proteins were detected by immunoblotting using the anti-HA antibody followed by staining with Ponceau-S to assess the amount of GST fusion proteins used in the binding assay. Shown are representative blots from one of three independent experiments.

**Supplemental Figure S3:** (A) EGFR degradation was assessed in HeLa cells transfected with FLAG-STAM-1-GAT, FLAG-Arr-2-(25-161) or pCMV. Cells were treated with 100 ng/ml EFG for 1 hr followed by immunoblotting as described in Materials and methods. Shown are representative immunoblots from one of three independent experiments. (B) Bar graph represents that amount of EGFR degraded as compared to vehicle treated cells  $\pm$  S.E.M. from three independent experiments. Data were analyzed by one-way analysis of variance and were found not to be significantly different.

# Malik and Marchese Supplementary Figure S1

**A**

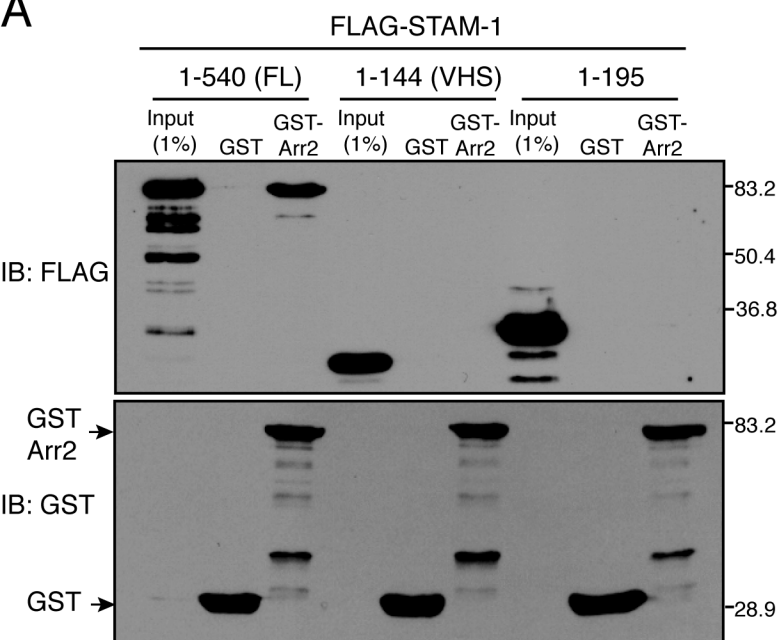

**B**

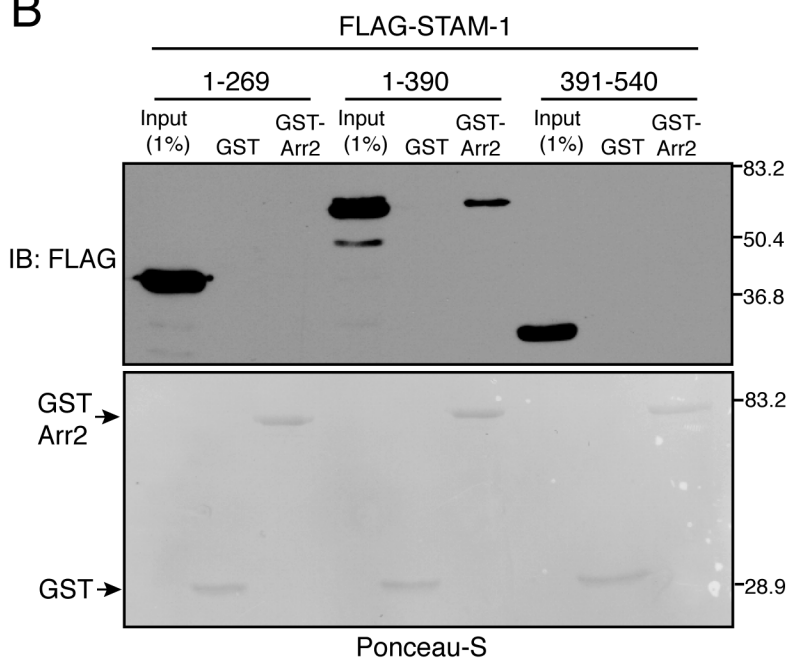

**C**

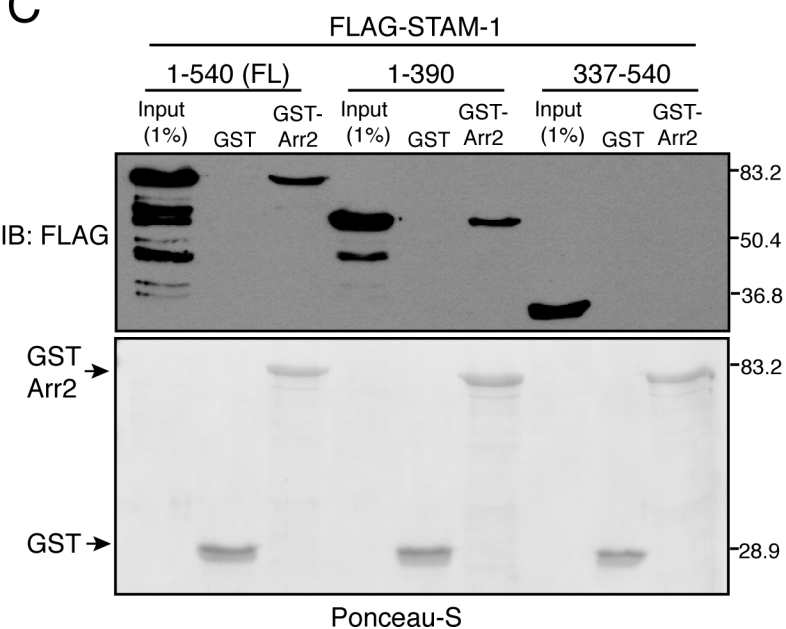

**D**

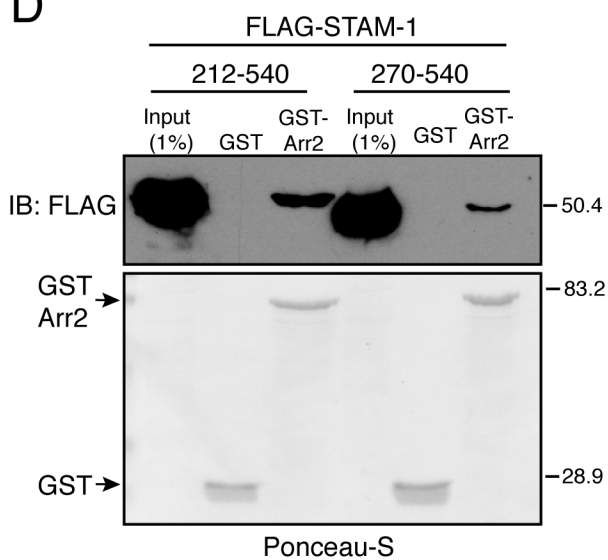

**E**

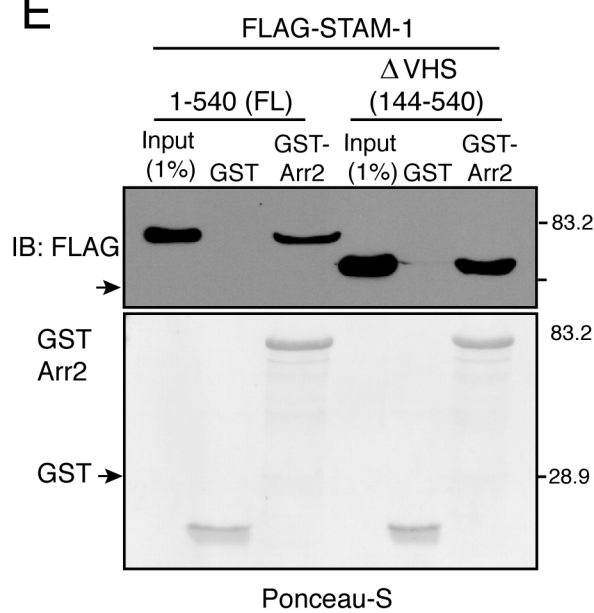

**A**

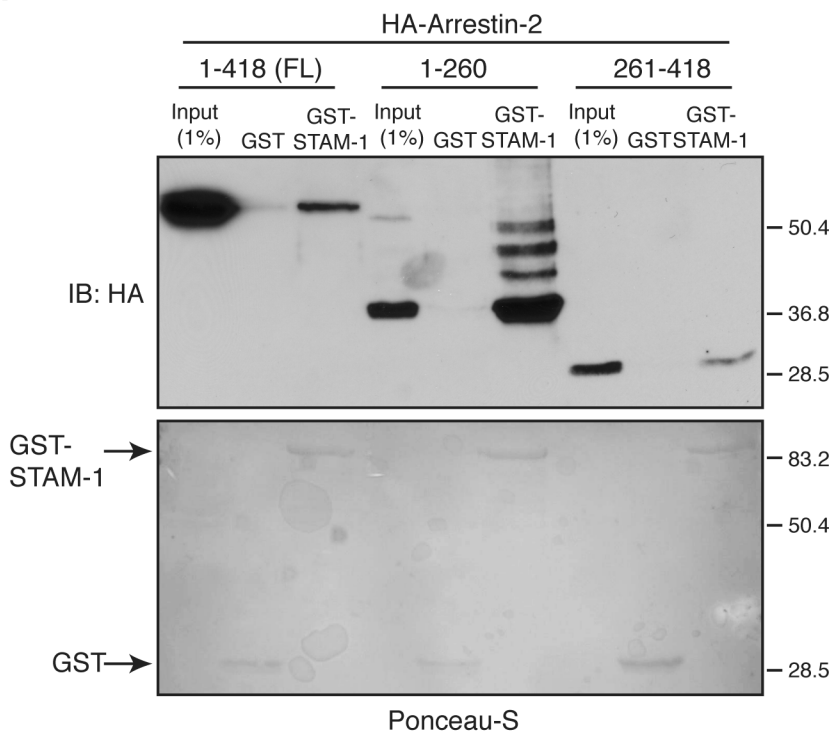

**B**

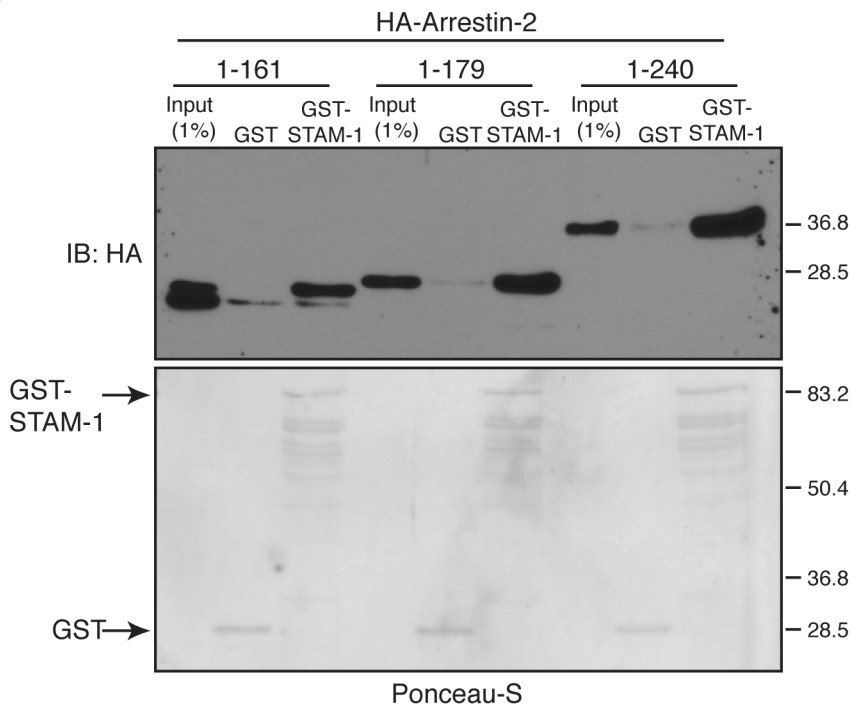

# Malik and Marchese Supplementary Figure S3

## A

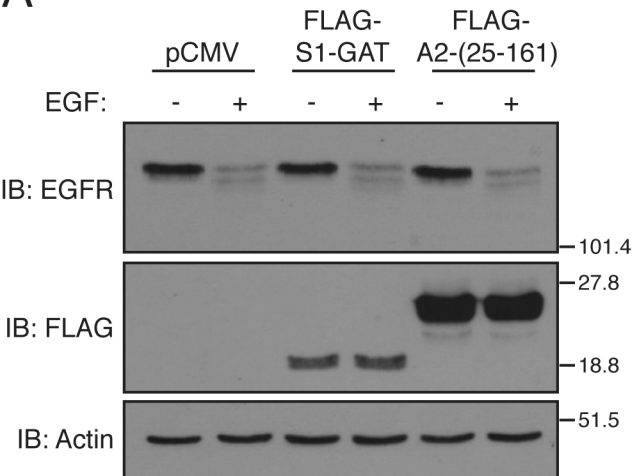

## B

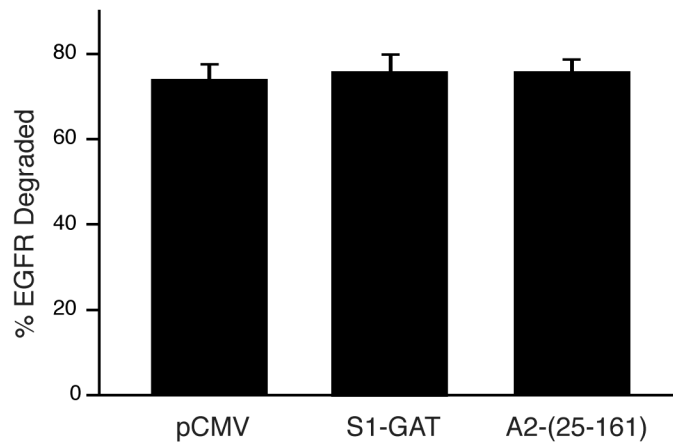

Supplement: E10-02-0169_1.pdf [file E10-02-0169_1.pdf]
